# Supplementary material
Source: PubMed Central journal article supplement (PMC3299407)

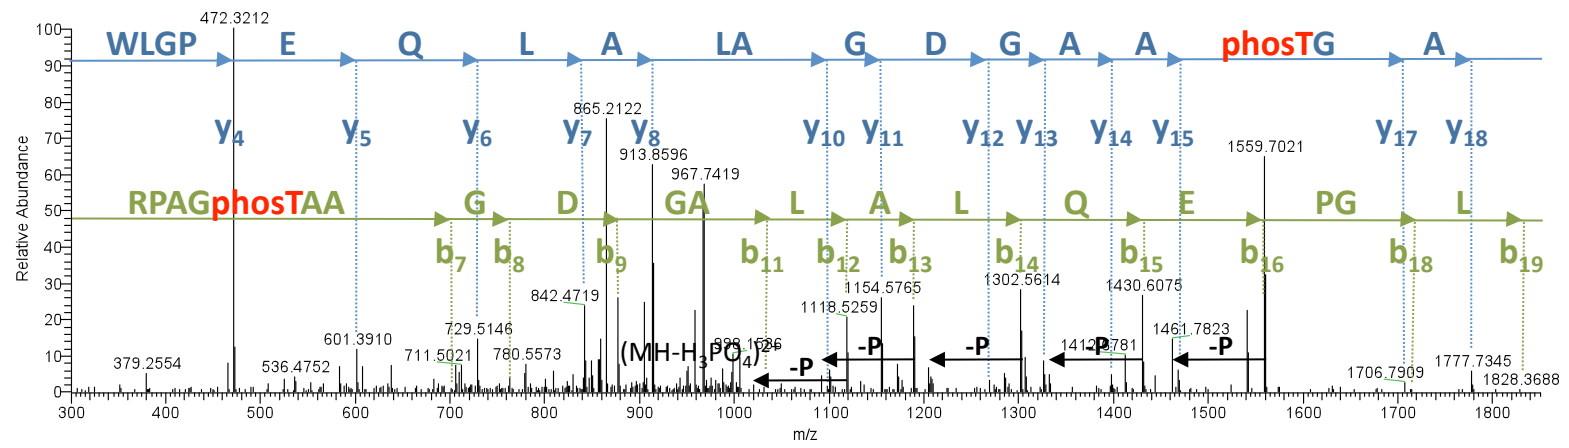

Supplement: NIHMS325038-supplement-supp_figure.pdf [file NIHMS325038-supplement-supp_figure.pdf]
